# Supplementary material
Source: MDPI journal article supplement (https://www.mdpi.com/1424-8247/14/11/1071)

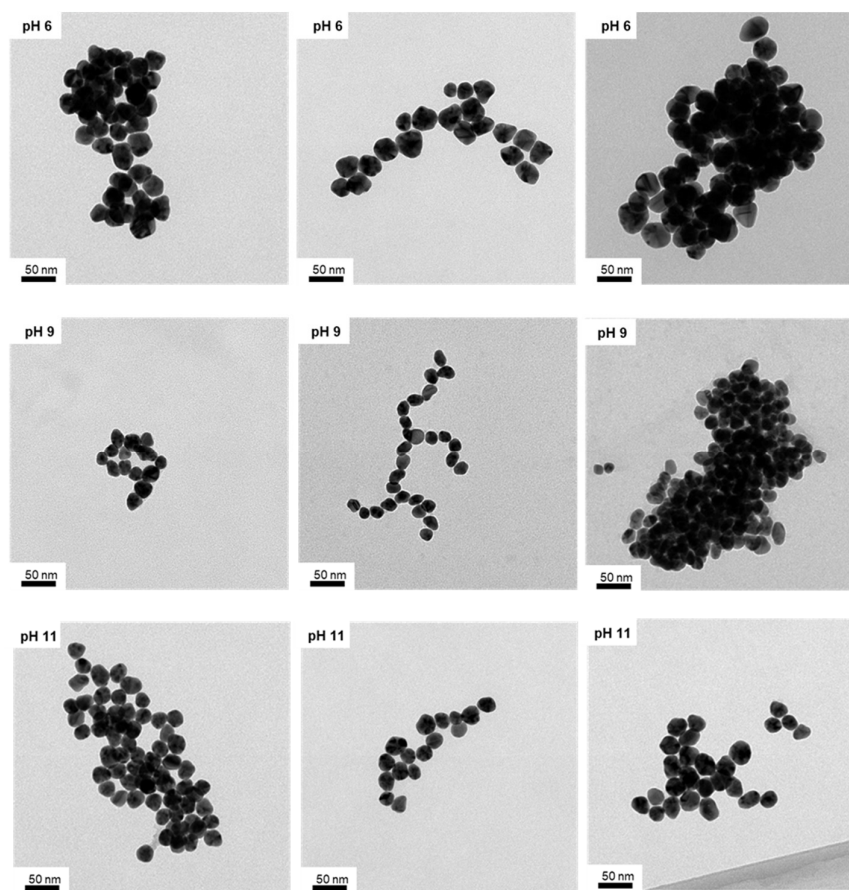

**Supplementary Figure S1.** TEM images for GA-AuNPs prepared at pH 6, pH 9 and pH 11.

Supplement: s1 [file s1]
